# Supplementary material for: Involvement of the eIF2α Kinase GCN2 in UV-B Responses
Source: PubMed Central journal article supplement (PMC6892979; doi:10.3389/fpls.2019.01492), 2019-11-28
Supplement: DataSheet_1.pdf [file DataSheet_1.pdf]

# Involvement of the eIF2a kinase GCN2 in UV-B responses

Paula Llabata, Julia Richter, Isabel Faus, Karolina Słomińska-Durdasiak, Lukas Hubert Zeh, Jose Gadea, Marie-Theres Hauser

## Supplementary Material

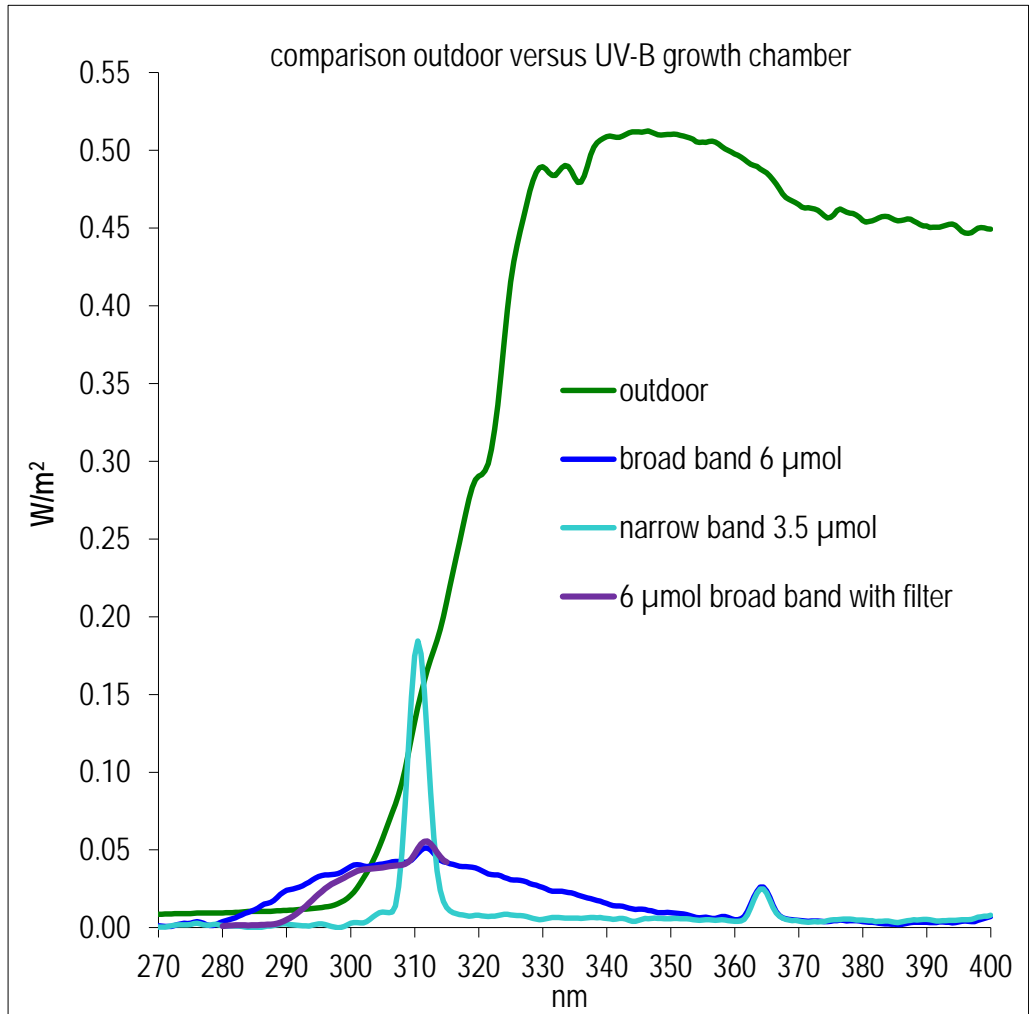

**Supplementary Figure S1** Light spectra of the filtered and unfiltered broad and narrow band UV-B lamps in relation to a sun spectra taken at noon on a cloud less day in the middle of June in Vienna.

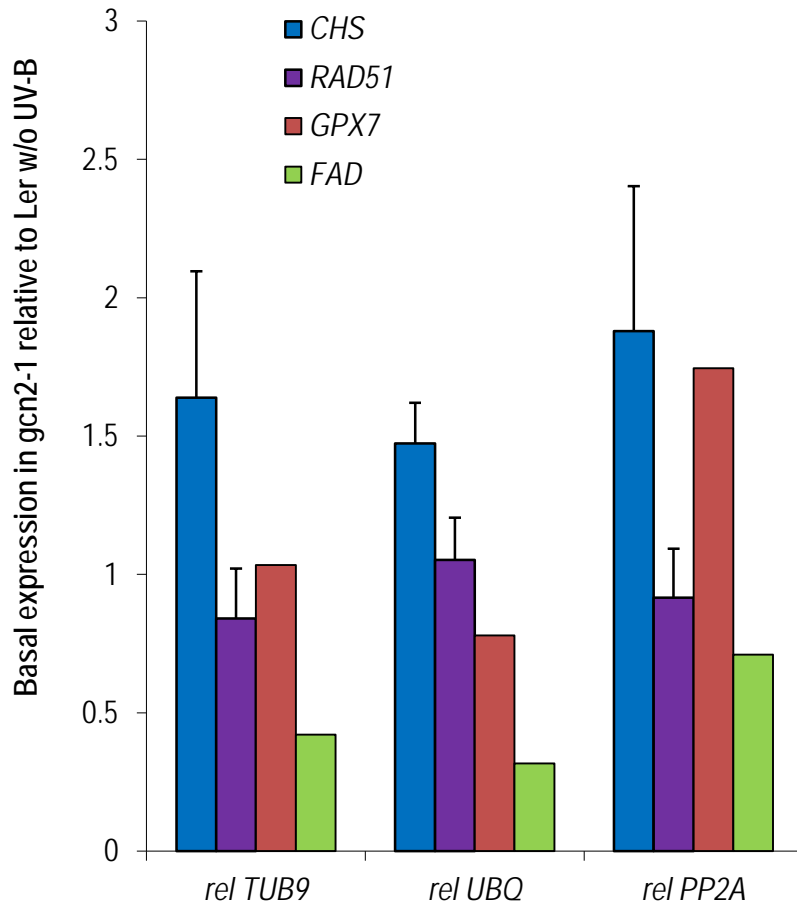

**Supplementary Figure S2** Normalized expression with three reference genes, *TUB9*, *UBQ* and *PP2A*. *CHS* is constitutively upregulated in *gcn2-1*, while *FAD* is lower expressed in relation to the wildtype, Ler. *RAD51* is similarly expressed in *gcn2-1* and Ler independent of the reference genes used for normalization. For *GPX7* normalization with *TUB9* and *UBQ* would result in a similar expression to wildtype while with *PP2A* indicates a constitutive higher expression in *gcn2-1*. However if the normalization is done with all three reference genes, the difference is not significant (see Figure 3A.)

**A**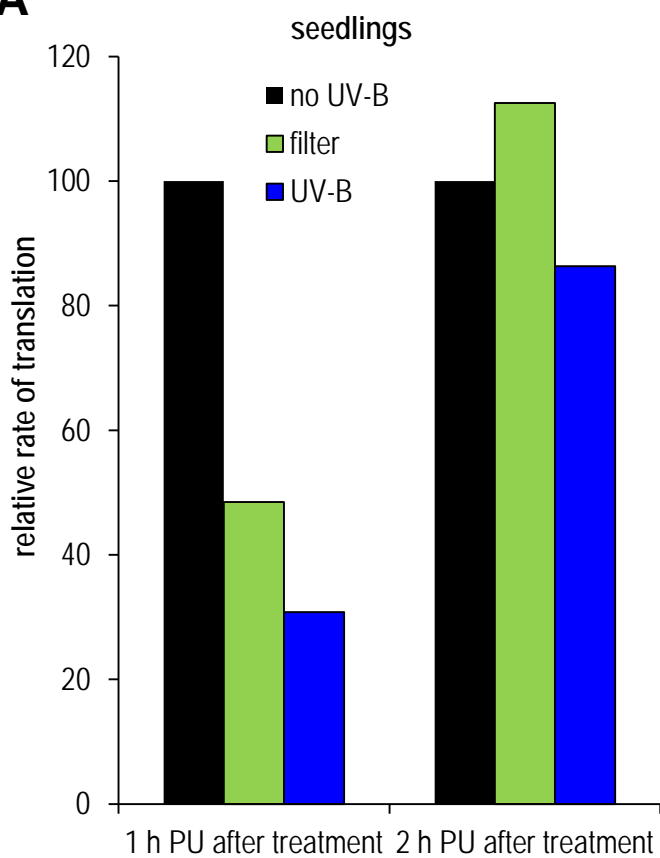**B**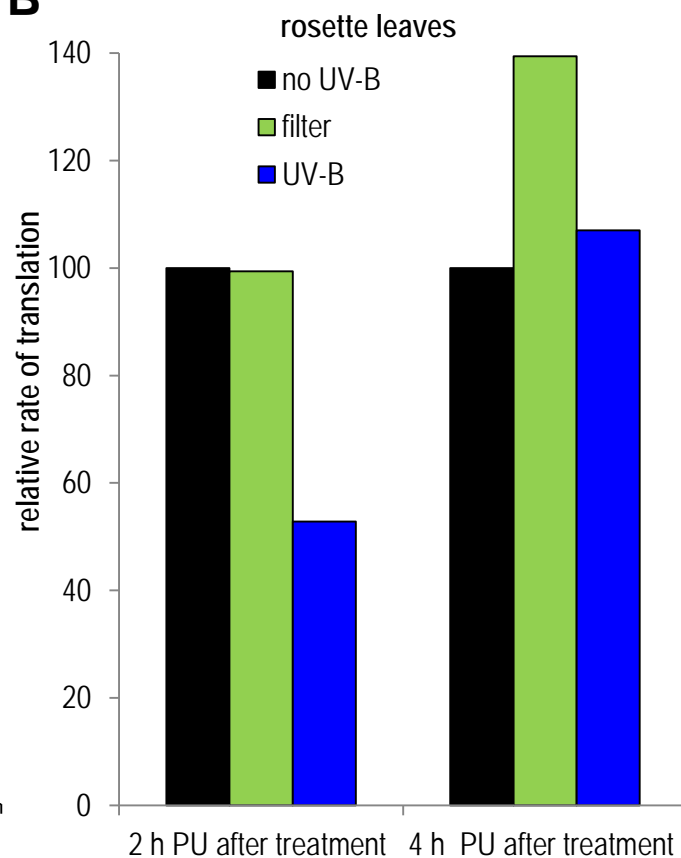

**Supplementary Figure S3** Rate of translation at different time points after UV-B in (A) seedlings and (B) rosette leaves. Samples were treated for 1 h with either filtered or unfiltered broad band UV-B and PU was added either 1 h, 2 h or 4 h after UV-B shut down. (A) seedlings, (B) rosette leaves.

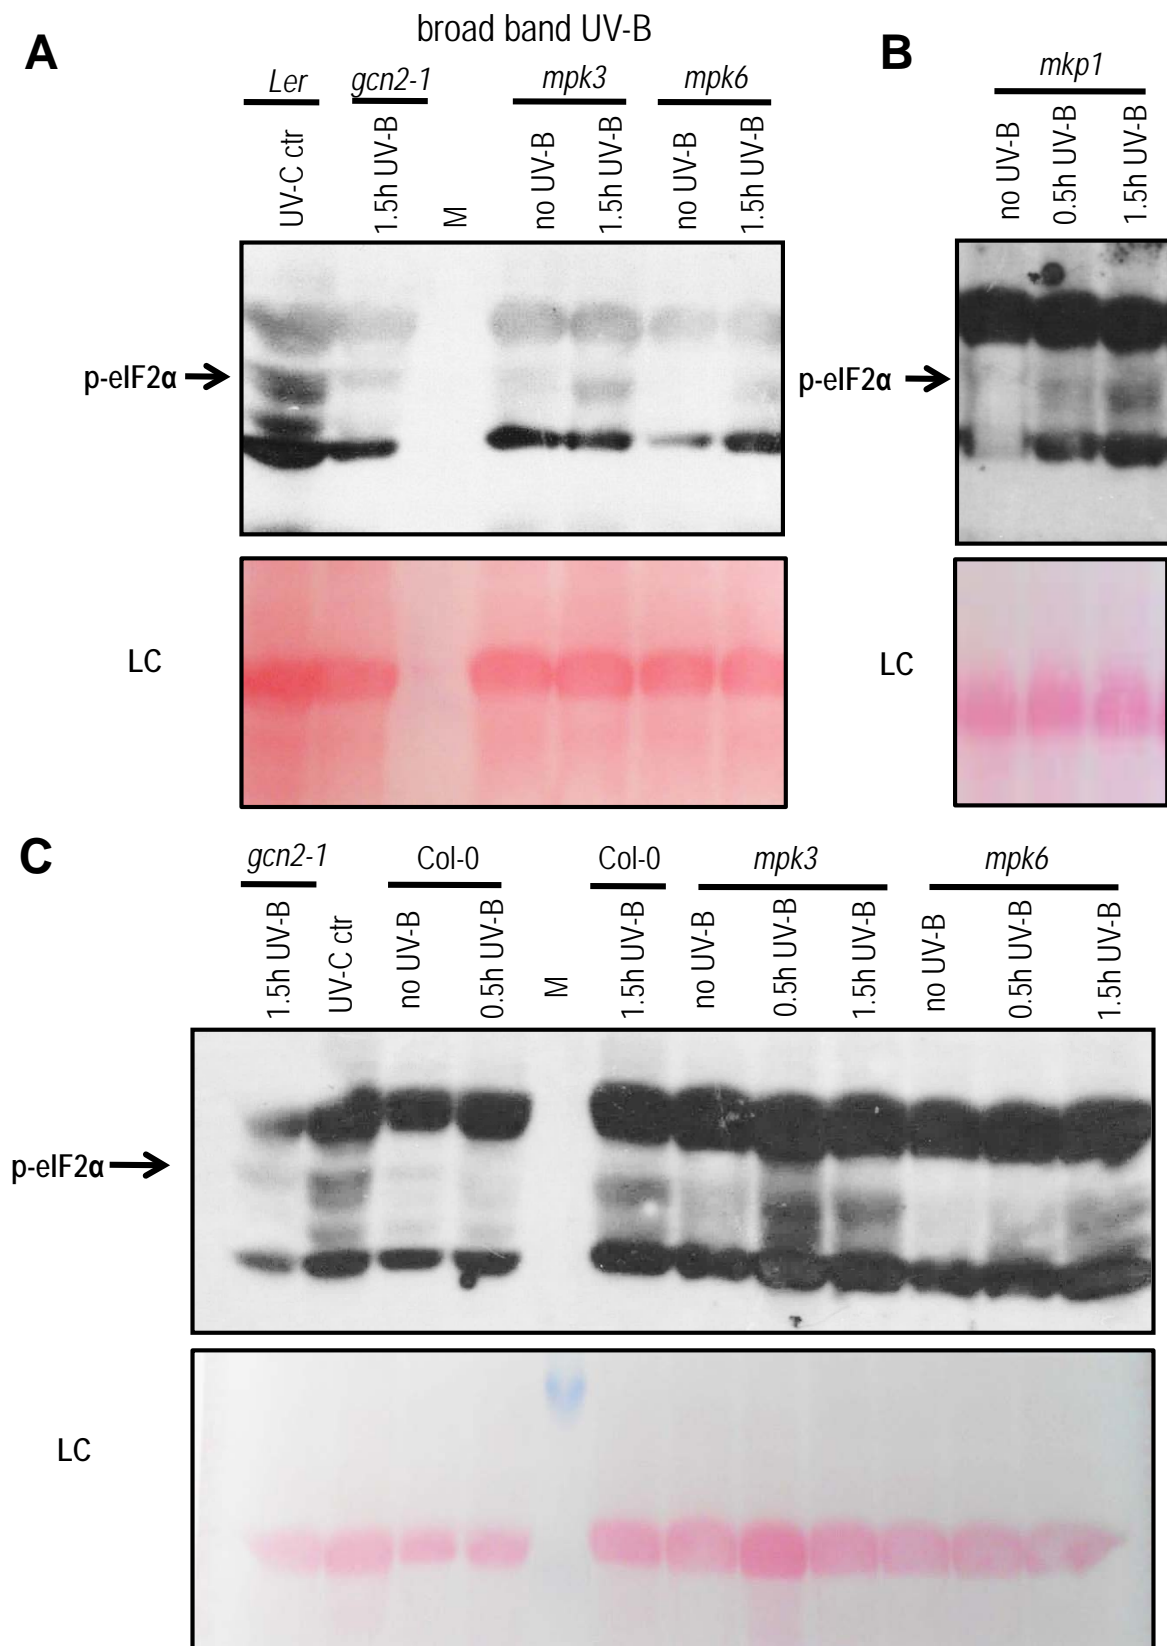

**Supplementary Figure S4** Western blots assaying the activation of GCN2 via eIF2 $\alpha$  phosphorylation in mutants of the MAP kinase stress signaling pathway. (A) Mutants and wildtype before and 1.5 h after the onset of 6  $\mu\text{mol m}^{-2} \text{s}^{-1}$  broad band UV-B. (B) eIF2 $\alpha$  phosphorylation in the mutant of the negative regulator of stress signaling *mkp1* after 0.5 h and 1.5 h of 10  $\mu\text{mol m}^{-2} \text{s}^{-1}$  broad band UV-B. (C) Time course of mutants and wildtype before, 0.5 h and 1.5 h after the onset of 10  $\mu\text{mol m}^{-2} \text{s}^{-1}$  broad band UV-B. Equal amount of protein (20  $\mu\text{g}$ ) was loaded on 10% SDS-PAGEs. LC: Loading control

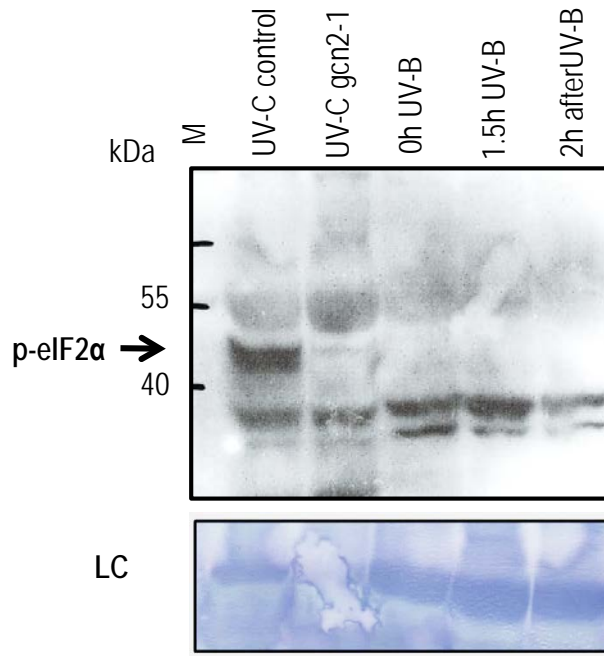

**Supplementary Figure S5** Narrow band UV-B does not activate GCN2 assayed through Western blot analyses for eIF2 $\alpha$  phosphorylation. Equal amount of protein (20  $\mu$ g) was loaded on 10% SDS-PAGEs. After blotting the separated proteins, the membrane was probed for phosphorylated eIF2 $\alpha$ . LC: Loading control

**Supplementary Table S1: Primer characteristics for RT-qPCR**

| Primer Name        | Primer Sequence 5'-3'     | Fragment size in bp | Efficiencies |
|--------------------|---------------------------|---------------------|--------------|
| 4g20890_TUB9-F     | GTACCTTGAAGCTTGCTAATCCTA  | cDNA 360, gDNA 470  | 0.77 +/-0.04 |
| 4g20890_TUB9-R     | GTTCTGGACGTTTCATCATCTGTTC |                     |              |
| 1g13320_PP2A-F     | TCTAGAGATGATTAACAACCCA    | cDNA 401, gDNA 615  | 0.92 +/-0.06 |
| 1g13320_PP2A-R     | ACAACACACGACAAAGTATCG     |                     |              |
| 3g62250_CUBQ       | CTCCTTCTTTCTGGTAAACGT     | gDNA = cDNA 426     | 0.74 +/-0.01 |
| 3g62250_NQ         | AACCCTTGAGGTTGAATCATCC    |                     |              |
| 5g13930_CHS-F      | ACTACTTCCGCATCACCAACA     | gDNA = cDNA 197     | 0.72 +/-0.01 |
| 5g13930_CHS-R      | GCTTAGGGACTTCGACCACCAC    |                     |              |
| 1g26380_FADoxred-F | CGAAAAACACGAGGTTCTCG      | gDNA = cDNA 290     | 0.71 +/-0.03 |
| 1g26380_FADoxred-R | CCTCATCGATCTTCACGTAG      |                     |              |
| 4g31870_GPX7- F    | TGCAGCAGAGAAGTCTGTTC      | gDNA 828, cDNA 369  | 0.88 +/-0.03 |
| 4g31870_GPX7-R     | ATCACCAAGGAAACCACCAG      |                     |              |
| 5g20850_RAD51-R    | TGTTGTGGTGGCATGAGCCA      | gDNA 318, cDNA 229  | 0.83 +/-0.04 |
| 5g20850_RAD51-F    | ATAGTGCTACCGCTCTCTAC      |                     |              |
